# Supplementary material
Source: publisher site journal article supplement (https://www.dovepress.com/article/416276)

Figure S1: The structural information of the targeted drugs about FR-DEGs in the DGI2db database. We predicted the targeted drugs of FR-DEGs using the DGI2db database, we investigated 71 drugs that target FR-DEGs, including 23 for STAT3, 5 for CBR1, 2 for ELAVL1, 3 for EPAS1, NOX1 targeted 2 drugs and VEGFA targeted 37 drugs. Moreover, the structural formulas of the 71 drugs listed above were retrieved using the DrugBank database. A total of 44 drug structures were retrieved. The structural information of the targeted drugs was revealed. The detailed results were illustrated in Figure S1.

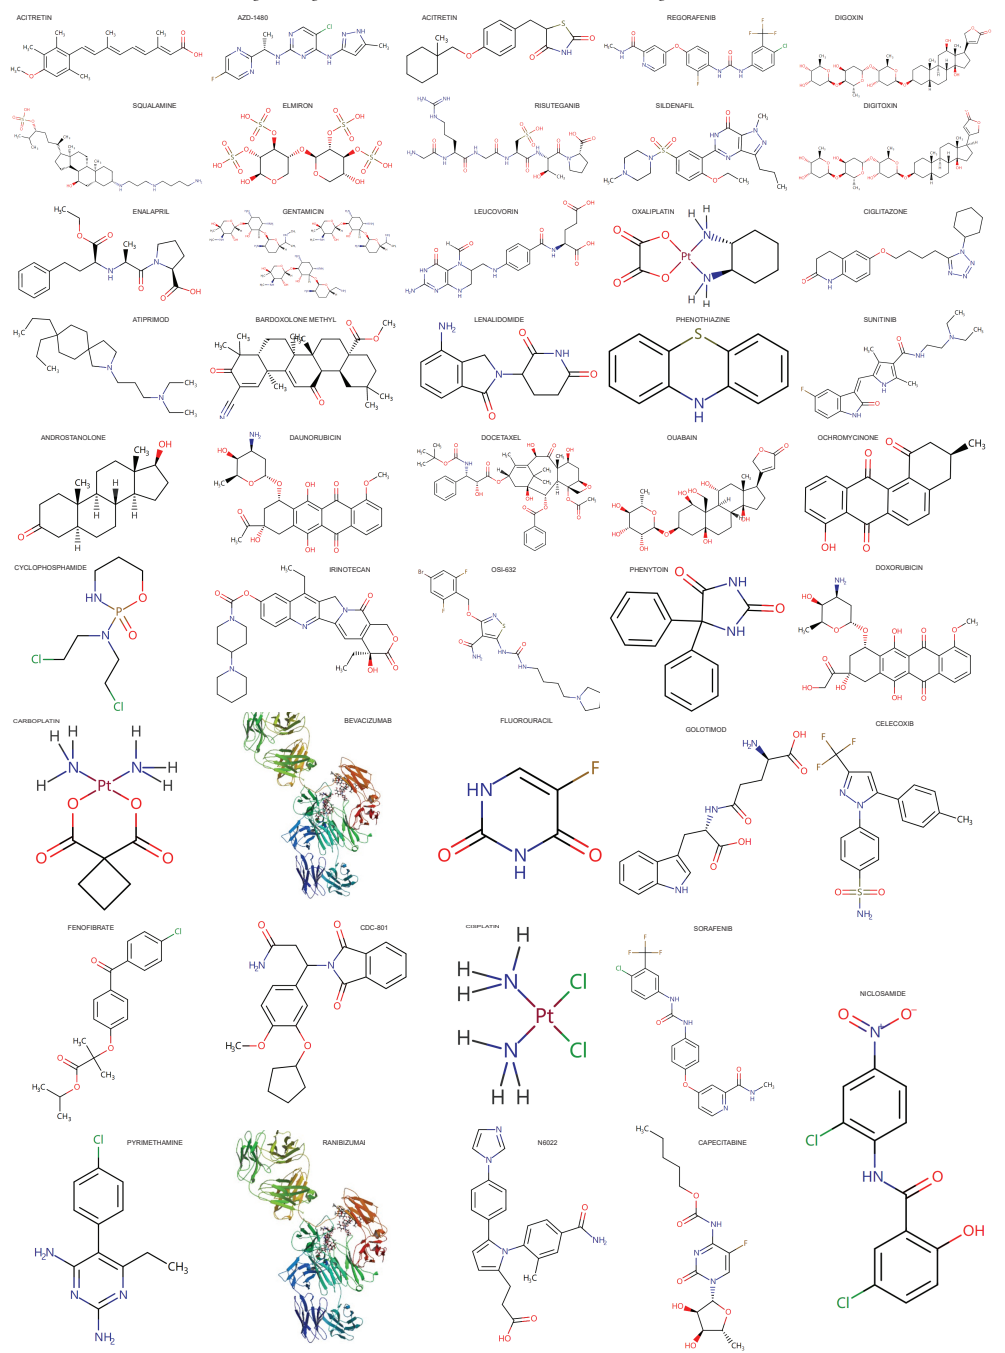

Supplement: Supplementary file 1 [file FigureS1.pdf › FigureS1.pdf]
